# Supplementary material for: Determinants, Prevalence and Trend of Use of Medicinal Plants Among People Living with HIV: A Cross-Sectional Survey in Dschang, Cameroon
Source: Springer Nature journal article supplement (doi:10.1007/s10461-018-02388-2), 2019-01-03
Supplement: MOESM2 [file 16373154]

|  | **Scientific names** | **Vernacular/local names** |
| --- | --- | --- |
|  | **Aframomum melegueta** | Djidjim |
|  | **Ageratum conizoides** | roi des herbes |
|  | **Alium cepa** | Onion |
|  | **Alium sativum** | Garlic |
|  | **Aloe barbadensis** | aloe vera |
|  | **Alstonia congensis** | quinine sauvage ou Ekouk ou Kock Mor |
|  | **Ananas comosus** | Ananas |
|  | **Annona muricata** | Corossol |
|  | **Beta vulgaris L.** | Betterave |
|  | **Brassica oleracea** | chou rouge |
|  | **Canarium schwenfurthii** | fruit noir |
|  | **Carica papaya** | Papayer |
|  | **Citrus limonum** | Citronnier |
|  | **Citrus sinensis** | Orangier |
|  | **Citrus x paradisi** | Pamplemoussier |
|  | **Cola acuminata** | Kolatier |
|  | **Combretum micranthum** | Kinkéliba |
|  | **Conyza canadensis** | Nvenguim ou vergerette du Canada |
|  | **Cymbopogon citratus** | Fipagrassi; Fhou Ngouoya |
|  | **Dracaena fragrans** | arbre de la paix |
|  | **Emilia coccinea** | herbe de lapin |
|  | **Eremomastax speciosa** | rouge d’un coté |
|  | **Eucalyptus camaldulensis** | ecalyptus rouge |
|  | **Eucalyptus globulus** | Ecalyptus |
|  | **Ficus thonningii** | Membeu Mo’oh |
|  | **Garcinia kola** | Bita kola |
|  | **Garcinia lucida** | Essock |
|  | **Hibiscus sabdariffa** | Foléré |
|  | **Kalanchoe crenata** | Djoudjou; Ntom-Ntountou |
|  | **Mangifera indica** | Manguier |
|  | **Manihot esculenta Crantz.** | Pkwem ou Cassala |
|  | **Milicia excelsa** | Abang ou Iroko |
|  | **Musa × paradisiaca** | Plantain |
|  | **Musa sinensis** | Bananier |
|  | **Ocimum gratissimum** | Cotmajo |
|  | **Ocimum gratissimum** | Massep |
|  | **Pennisetum purpureum** | Sissongo |
|  | **Persea americana** | Avocatier |
|  | **Petroselinum crispum** | Persil |
|  | **Prunus africana** | Pygeum |
|  | **Psidium guayava L.** | Goyavier |
|  | **Solanum melongena** | aubergine sauvage |
|  | **Tamarindus indica** | Tamarin |
|  | **Thymus vulgaris** | Thym |
|  | **Tropaelum majus** | Capucine |
|  | **Vernonia amygdalina** | Ndolè; bittaleaf |
|  | **Viscum album** | Tsaplà ou Ngui d’Afrique |
|  | **Zingiber officinale** | Djindja |
|  | **Moringa oleifera** | Moringa |
|  |  | Djudjum toùh |
|  |  | Engouagui |
|  |  | Fhou net |
|  |  | Fhoue kui keck |
|  |  | Fhoue làh ou sans dose |
|  |  | Guelup |
|  |  | Kuikaclé ou antibiotique ; Huikacli |
|  |  | Lejou ou antibiotique |
|  |  | Leulap |
|  |  | Ndem blanc ou Feù-dem |
|  |  | Nguimzet |
|  |  | Njueuh |
|  |  | Pantuh |
|  |  | rouge-tete |
|  |  | Rubeckie |
|  |  | She'e Letong |
|  |  | Sikong |
|  |  | Tsele sec |
|  |  | Tsemguim |
|  |  | Mrbeuheu Ser |
|  |  | Tseutseuneck ou epingle noir ; Tseunè |
